# Supplementary material for: Vitamin D Supplementation and Vitamin D Status during Pregnancy and the Risk of Congenital Anomalies—A Systematic Review and Meta-Analysis
Source: MDPI journal article supplement (doi:10.3390/nu15092125), 2023-04-28
Supplement: s1 [file s1]

**Table S1.** Search terms and strategy.

| Aspect 1                                                                                                                                                                                                                                                                                                |     | Aspect 2                                                                                                                                                                                                                                                                                                                                                                                                                                                                                                                                                                                                                                                                                                                                                                                                             |
|---------------------------------------------------------------------------------------------------------------------------------------------------------------------------------------------------------------------------------------------------------------------------------------------------------|-----|----------------------------------------------------------------------------------------------------------------------------------------------------------------------------------------------------------------------------------------------------------------------------------------------------------------------------------------------------------------------------------------------------------------------------------------------------------------------------------------------------------------------------------------------------------------------------------------------------------------------------------------------------------------------------------------------------------------------------------------------------------------------------------------------------------------------|
| Fetal life                                                                                                                                                                                                                                                                                              | AND | Vitamin D                                                                                                                                                                                                                                                                                                                                                                                                                                                                                                                                                                                                                                                                                                                                                                                                            |
| fetal life OR Fetus OR foetus OR fetal OR foetal OR foetale<br>OR Pregnant OR Pregnancy OR Neonate OR<br>fetal programming OR periconception OR periconceptual<br>OR periconceptionally OR preconception OR<br>preconceptional OR preconceptionally OR Newborn OR<br>Maternal OR Prenatal OR prenatally |     | vitamin D OR 25-hydroxyvitamin D OR 1,25-dihydroxy-<br>vitamin D OR calcitriol OR ergocalciferol OR<br>cholecalciferol OR vitamin D2 OR vitamin D3 OR 1-<br>alpha hydroxyvitamin D3 OR 1-alpha-hydroxy-vitamin<br>D3 OR 1-alpha hydroxy-vitamin D3 OR 1-alpha<br>hydroxy calciferol OR 1-alpha-hydroxy-calciferol OR 1-<br>alpha hydroxycalciferol OR 1,25 dihydroxyvitamin D3<br>OR 1,25-dihydroxy-vitamin D3 OR 1,25-<br>dihydroxycholecalciferol OR 1,25-<br>dihydroxycholecalciferol OR 25-hydroxy-vitamin D OR<br>25 hydroxy vitamin D OR 25-hydroxycholecalciferol OR<br>25 hydroxycholecalciferol OR 25 hydroxyvitamin D OR<br>alfacalcidol OR calcidiol OR calcitriol OR calciferol OR<br>ergocalciferol OR cholecalciferol OR calcifediol OR ultra<br>violet rays OR UV rays OR sunlight OR ergocalciferols |

Search terms used in the search are presented in the following table. The example is for PubMed database. All terms were searched for as free text as well as MeSH terms. Filters applied: Human.

**Table S2.** Study identification.

| Author, Year, Country      | Study design | Outcome (method of assessment)               | Trial registration                                                                   | Conflict of interest                                                                                                                                                                                                                                                                                                                                                                                                                                                                            |
|----------------------------|--------------|----------------------------------------------|--------------------------------------------------------------------------------------|-------------------------------------------------------------------------------------------------------------------------------------------------------------------------------------------------------------------------------------------------------------------------------------------------------------------------------------------------------------------------------------------------------------------------------------------------------------------------------------------------|
| Ates, 2016, Turkey [24]    | Cohort       | Congenital Malformations (not reported)      | Not reported                                                                         | The authors declare no conflicts of interest                                                                                                                                                                                                                                                                                                                                                                                                                                                    |
| Chawes, 2016, Denmark [16] | RCT          | Congenital Malformations, any (not reported) | Clinicaltrials.gov<br>NCT00856947                                                    | Dr Bisgaard reports receiving consulting fees from Chiesi.                                                                                                                                                                                                                                                                                                                                                                                                                                      |
| Cooper, 2016, UK [17]      | RCT          | Congenital abnormalities (not reported)      | ISRCTN<br>82927713.<br>European Clinical Trials Database,<br>EudraCT 2007–001716–23. | The authors declare that “This work was supported by grants from Arthritis Research UK, Medical Research Council (MRC), Bupa Foundation, National Institute for Health Research (NIHR) Southampton Biomedical Research Centre, University of Southampton and University Hospital Southampton NHS Foundation Trust, and NIHR Musculoskeletal Biomedical Research Unit, University of Oxford. IS and AP were funded by the MRC (programme code U105960371). The work leading to these results was |

|                           |                            |                                                                                                                                  |              |                                                                                                                                                                                                                                                                                                                                                                  |
|---------------------------|----------------------------|----------------------------------------------------------------------------------------------------------------------------------|--------------|------------------------------------------------------------------------------------------------------------------------------------------------------------------------------------------------------------------------------------------------------------------------------------------------------------------------------------------------------------------|
|                           |                            |                                                                                                                                  |              | <p>supported by the European Union's Seventh Framework Programme (FP7/2007–2013), projects EarlyNutrition and ODIN under grant agreements numbers 289346 and 613977. We are extremely grateful to Merck GmbH for the kind provision of the Vigantoletten supplement".</p> <p>The authors further declare other interests including personal fees and grants.</p> |
| Daglar, 2014, Turkey [22] | Controlled cross-sectional | Neural tube defects; meningocele, meningomyelocele, encephalocele, anencephaly and fetal acrania (Ultrasonographic examinations) | Not reported | The authors declare no conflicts of interest                                                                                                                                                                                                                                                                                                                     |

|                                       |                 |                                                                              |                                                                                         |                                                                                                                                                                                                                                                  |
|---------------------------------------|-----------------|------------------------------------------------------------------------------|-----------------------------------------------------------------------------------------|--------------------------------------------------------------------------------------------------------------------------------------------------------------------------------------------------------------------------------------------------|
| Dilli, 2018,<br>Turkey [26]           | Case-control    | Congenital heart disease (confirmed by echocardiography or catheterisation.) | Not reported                                                                            | The authors declare no conflicts of interest                                                                                                                                                                                                     |
| Fernández-Alonso, 2012,<br>Spain [20] | Cross-sectional | Congenital Malformations (not reported)                                      | The study protocol was approved by the Research Ethics Committee of the study hospital. | Not reported                                                                                                                                                                                                                                     |
| Litonjua, 2016,<br>USA [18]           | RCT             | Major fetal or congenital anomaly (not reported)                             | clinicaltrials.gov (NCT00920621)                                                        | <p>The authors declare that; “All authors have completed and submitted the ICMJE Form for Disclosure of Potential Conflicts of Interest.</p> <p>Dr Litonjua reported receiving personal fees from UpToDate Inc and Springer Humana Press. Dr</p> |

|  |  |  |  |                                                                                                                                                                                                                                                                                                                                                                                                                                                                                                                                                                                                                                                                                                                                                                                                                                                                                                                     |
|--|--|--|--|---------------------------------------------------------------------------------------------------------------------------------------------------------------------------------------------------------------------------------------------------------------------------------------------------------------------------------------------------------------------------------------------------------------------------------------------------------------------------------------------------------------------------------------------------------------------------------------------------------------------------------------------------------------------------------------------------------------------------------------------------------------------------------------------------------------------------------------------------------------------------------------------------------------------|
|  |  |  |  | <p>McElrath reported receiving grants from the National Institutes of Health (NIH). Dr O'Connor reported receiving grants from the NIH. Dr Bacharier reported receiving grants from the NIH and National Heart, Lung, and Blood Institute (NHBLI), and personal fees from Aerocrine, GlaxoSmithKline, Genentech/Novartis, Merck, Schering, Cephalon, DBV Technologies, Teva, Boehringer Ingelheim, AstraZeneca, WebMD/ Medscape, Sanofi, and Vectura. Dr Zeiger reported receiving grants from the NHBLI, AstraZeneca, Aerocrine, MedImmune, Genentech, Merck, and GlaxoSmithKline and personal fees from Genentech, Novartis, GlaxoSmithKline, and TEVA. Dr Hornsby reported receiving an NIH ancillary grant. Dr Hawrylowicz reported receiving an NIH ancillary grant, a fellowship grant from Wellcome Trust Clinical Training Research Fellowship, grant G100758 from the Medical Research Council Centre,</p> |
|--|--|--|--|---------------------------------------------------------------------------------------------------------------------------------------------------------------------------------------------------------------------------------------------------------------------------------------------------------------------------------------------------------------------------------------------------------------------------------------------------------------------------------------------------------------------------------------------------------------------------------------------------------------------------------------------------------------------------------------------------------------------------------------------------------------------------------------------------------------------------------------------------------------------------------------------------------------------|

|                           |                    |                                                                               |              |                                                                                                                                                                                                                                                                                                                                                                                                           |
|---------------------------|--------------------|-------------------------------------------------------------------------------|--------------|-----------------------------------------------------------------------------------------------------------------------------------------------------------------------------------------------------------------------------------------------------------------------------------------------------------------------------------------------------------------------------------------------------------|
|                           |                    |                                                                               |              | <p>and grants from Asthma UK, the Lord Leonard and Lady Estelle Wolfson Foundation, and the Alpha 1 Foundation. No other disclosures were reported.</p> <p>VDAART was supported by grant U01HL091528 from the NHLBI. Additional support was provided by grant U54TR001012 from the National Centers for Advancing Translational Sciences (NCATS) for participant visits at the Boston Medical Center.</p> |
| Mokhtar, 2018, Egypt [27] | Case-control       | Congenital heart defects (confirmed by the pediatric cardiologist using ECHO) | Not reported | The authors declare no conflicts of interest                                                                                                                                                                                                                                                                                                                                                              |
| Nasri, 2016, Tunisia [23] | Case-control study | Neural tube defects                                                           | Not reported | The authors declare no conflicts of interest                                                                                                                                                                                                                                                                                                                                                              |

|                                 |                            |                                                                                                                                                                                       |                                     |                                              |
|---------------------------------|----------------------------|---------------------------------------------------------------------------------------------------------------------------------------------------------------------------------------|-------------------------------------|----------------------------------------------|
|                                 |                            | (not reported)                                                                                                                                                                        |                                     |                                              |
| Zhou, 2014,<br>China [21]       | Cohort                     | Malformations including nervous system, circulatory system, digestive system, reproductive system, urinary system, musculoskeletal, chromosome disorder and others.<br>(not reported) | Not reported                        | The authors declare no conflict of interest  |
| Roth 2018,<br>Canada [19]       | RCT                        | Congenital anomalies<br>(not reported)                                                                                                                                                | ClinicalTrials.gov<br>(NCT01924013) | The authors declare no conflicts of interest |
| Sirinoglu, 2018,<br>Turkey [28] | Case-control               | Fetal anomaly of neural tube origin<br>(sonographically detected)                                                                                                                     | Not reported                        | The authors declare no conflicts of interest |
| Turkmen, 2017,<br>Turkey [25]   | Controlled cross-sectional | congenital diaphragmatic hernia                                                                                                                                                       | Not reported                        | The authors declare no conflicts of interest |

|  |  |                                    |  |  |
|--|--|------------------------------------|--|--|
|  |  | (ultrasonographic<br>examinations) |  |  |
|--|--|------------------------------------|--|--|

|       |               | Risk of bias domains                                                              |                                                                                   |                                                                                   |                                                                                    |                                                                                     |                                                                                     |
|-------|---------------|-----------------------------------------------------------------------------------|-----------------------------------------------------------------------------------|-----------------------------------------------------------------------------------|------------------------------------------------------------------------------------|-------------------------------------------------------------------------------------|-------------------------------------------------------------------------------------|
|       |               | D1                                                                                | D2                                                                                | D3                                                                                | D4                                                                                 | D5                                                                                  | Overall                                                                             |
| Study | Chawes 2016   |  |  |  |  |  |  |
|       | Cooper 2016   |  |  |  |  |  |  |
|       | Litonjua 2016 |  |  |  |  |  |  |
|       | Roth 2018     |  |  |  |  |  |  |

Domains:

D1: Bias arising from the randomization process.

D2: Bias due to deviations from intended intervention.

D3: Bias due to missing outcome data.

D4: Bias in measurement of the outcome.

D5: Bias in selection of the reported result.

Judgement

 Some concerns

 Low

**Figure S1a.** Risk of bias assessment of included RCTs according to Cochranes Risk of Bias tool 2.

|       |                       | Risk of bias domains |    |    |    |    |    |    |         |
|-------|-----------------------|----------------------|----|----|----|----|----|----|---------|
|       |                       | D1                   | D2 | D3 | D4 | D5 | D6 | D7 | Overall |
| Study | Ates 2016             | !                    | +  | +  | ?  | +  | +  | -  | !       |
|       | Daglar 2014           | !                    | ?  | +  | ?  | +  | +  | -  | !       |
|       | Dilli 2018            | X                    | X  | +  | ?  | +  | +  | -  | X       |
|       | Fernandez-Alonso 2011 | !                    | +  | +  | +  | +  | +  | -  | !       |
|       | Mokhtar 2019          | !                    | X  | +  | ?  | +  | +  | -  | !       |
|       | Nasri 2016            | X                    | +  | +  | ?  | -  | +  | -  | X       |
|       | Sirinoglu 2018        | !                    | +  | +  | ?  | +  | +  | -  | !       |
|       | Turkmen 2017          | !                    | +  | +  | ?  | +  | +  | -  | !       |
|       | Zhou 2014             | X                    | +  | +  | ?  | +  | +  | -  | X       |

Domains:  
D1: Bias due to confounding.  
D2: Bias due to selection of participants.  
D3: Bias in classification of interventions.  
D4: Bias due to deviations from intended interventions.  
D5: Bias due to missing data.  
D6: Bias in measurement of outcomes.  
D7: Bias in selection of the reported result.

Judgement  
! Critical  
X Serious  
- Moderate  
+ Low  
? No information

**Figure S1b.** Risk of bias assessment of included observational studies according to ROBINS-I.
